1 **Hepatic AMPK activation in response to dynamic REDOX balance is a biomarker of**  
2 **exercise to improve blood glucose control**

3

4 Meiling Wu<sup>†1</sup>, Anda Zhao<sup>†1</sup>, Xingchen Yan<sup>†1</sup>, Hongyang Gao<sup>†2</sup>, Chunwang Zhang<sup>1</sup>, Xiaomin  
5 Liu<sup>1</sup>, Qiwen Luo<sup>1</sup>, Feizhou Xie<sup>3</sup>, Shanlin Liu<sup>‡1,4</sup>, Dongyun Shi<sup>‡1</sup>

6

7 **Affiliations**

8 <sup>1</sup> Department of Biochemistry and Molecular Biology, School of Basic Medical Sciences,  
9 Fudan University, Shanghai, 200032, People's Republic of China

10 <sup>2</sup> Institute of Electronmicroscopy, School of Basic Medical Sciences, Fudan University,  
11 Shanghai, 200032, People's Republic of China

12 <sup>3</sup> Changning Maternity and Infant Health Hospital, East China Normal University, Shanghai,  
13 200032, People's Republic of China

14 <sup>4</sup> Free Radical Regulation and Application Research Center of Fudan University, Shanghai,  
15 200032, People's Republic of China

16

17

18

19

20

21

22 <sup>†</sup> Co-first authors contributed equally to this work

23 <sup>‡</sup> Correspondence to Prof. Dongyun Shi (Email: [dyshi@fudan.edu.cn](mailto:dyshi@fudan.edu.cn)) and Prof. Shanlin Liu  
24 (Email: [slliu@shmu.edu.cn](mailto:slliu@shmu.edu.cn)), Department of Biochemistry and Molecular Biology, School of  
25 Basic Medical Sciences, Fudan University, NO.130 Dong'an Road, Shanghai, 200032,  
26 People's Republic of China, Tel: +021 54237299 Fax: +021 54237897

27 **Abstract**

28 Antioxidant intervention is considered to inhibit reactive oxygen species (ROS) and  
29 alleviates hyperglycemia. Paradoxically, moderate exercise can produce ROS to improve  
30 diabetes. The exact redox mechanism of these two different approaches remains largely  
31 unclear. Here, by comparing exercise and antioxidants intervention on type 2 diabetic rats,  
32 we found moderate exercise upregulated compensatory antioxidant capability and reached a  
33 higher level of redox balance in the liver. In contrast, antioxidant intervention achieved a  
34 low-level redox balance by inhibiting oxidative stress. Both of these two interventions could  
35 promote glycolysis and aerobic oxidation mediated by hepatic AMPK activation,  
36 ameliorating diabetes. During exercise, different levels of ROS generated by exercise have  
37 differential regulations on the activity and expression of hepatic AMPK. Moderate exercise-  
38 derived ROS promoted hepatic AMPK glutathionylation activation. However, excess  
39 exercise increased oxidative damage, and inhibited the activity and expression of AMPK.  
40 Overall, our results illustrate that both exercise and antioxidant intervention improve blood  
41 glucose in diabetes by promoting redox balance, despite the levels of redox balance are  
42 different. Moreover, the activation and expression of AMPK could act as a biomarker to  
43 reflect the effective treatment range for diabetes. This finding provides theoretical evidence  
44 for the precise regulation of diabetes by antioxidants and exercise.

45

46 **Key words**

47 Redox balance; AMPK; exercise; glutathionylation

48



## 49 **Introduction**

50

51 Diabetes mellitus is a chronic metabolic disorder disease, which has emerged as a global  
52 public health problem. According to the latest epidemiological data from the International  
53 Diabetes Federation, about 8.8% of the world population, or 415 million people, have  
54 diabetes as of 2019, about a 2.4% increase from that of 2010 (6.4%) (1). With the  
55 development of genomics, proteomics and metabolomics, it has been discovered by many  
56 studies that type 2 diabetes is associated with irreversible risk factors such as age, genetics,  
57 race, and ethnicity and reversible factors such as diet, physical activity and lifestyle (2, 3).  
58 Given the essential function of aerobic metabolism in glucose oxidation, mitochondrial  
59 damage and oxidative stress have been considered to play a critical role in the occurrence  
60 and development of diabetes (4). Exercise and antioxidant supplements are often suggested  
61 as essential therapeutic strategies in the early stages of type 2 diabetes (5, 6), with different  
62 mechanisms. It has been reported that chronic exercise training can alleviate oxidative stress  
63 and diabetic symptoms by improving cellular mitochondrial function and biogenesis in the  
64 diabetic state (7). Contradictorily, exercise also increases ROS production, while prolonged  
65 or high-intensity exercise could result in mitochondrial functional impairment to aggravate  
66 complications of diabetes (8). Since the 1970s, studies have demonstrated that 1 hour of  
67 moderate endurance exercise can increase lipid peroxidation in humans (9, 10). In 1998,  
68 Ashton directly detected increasing free radical levels in exercising humans using electron  
69 paramagnetic resonance spectroscopy (EPR) and spin capture (11). These results led to a  
70 great deal of interest in the role of ROS in physical exercise (12-14). Regarding the  
71 contradiction of exercise on ROS scavenging or production, James D Watson also  
72 hypothesized that type 2 diabetes is accelerated by insufficient oxidative stress rather than  
73 oxidative stress (15), based on the effect of exercise on diabetes treatment. Although  
74 Watson's opinions supported that exercise could treat diabetes by producing ROS, whether  
75 exercise-induced ROS production is beneficial or detrimental to diabetes is still being  
76 debated. The specific regulation of ROS produced by exercise on diabetic blood glucose in  
77 *vivo* is unclear. In contrast, the general view of the antioxidant treatment for diabetes is that  
78 antioxidants reduce cytotoxic ROS and oxidation products, thus alleviating diabetes and  
79 achieving glycemic control (16). Our previous study also found that hepatic mitochondrial  
80 ROS scavengers and antioxidant substances inhibited the oxidative products such as MDA  
81 and 4-HNE in diabetic animals and favored glycemic control (17, 18). Exercise-induced  
82 oxidation and antioxidant administration, as two opposite approaches, could achieve the

83 regulation of diabetes, respectively. However, the differences in redox mechanisms between  
84 these two approaches to diabetes treatment have not been fully understood.

85 It is well established that the increase of skeletal muscle glucose uptake during exercise is  
86 crucial in glycemic control (19-21). Considering that liver is another vital organ for  
87 maintaining blood glucose homeostasis, including storing, utilizing and producing glucose,  
88 exercise-induced hepatic redox metabolism is also significant. The activation of hepatic  
89 AMP-activated protein kinase (AMPK), which acts as a 'metabolic master switch', alleviates  
90 diabetes symptoms by reducing glycogen synthesis, increasing glycolysis, and promoting  
91 glucose absorption in surrounding tissues (22). Therefore, the activation of AMPK in the  
92 liver is significant for regulating glucose and lipid metabolism in the blood. Zmijewski et al.  
93 found that AMPK could be activated by hydrogen peroxide stimulation through direct  
94 oxidative modification (23). In contrast, other studies suggested that oxidative stress could  
95 disrupt the activation of the AMPK signaling pathway (24, 25). Our previous study explored  
96 the mechanism by which redox status contributes to hepatic AMPK dynamic activation.  
97 Under a low ROS microenvironment, GRXs mediated S-glutathione modification activates  
98 AMPK to improve glucose utilization. Meanwhile, under an excessive ROS  
99 microenvironment, sustained high level ROS might cause loss of AMPK protein (26). These  
100 studies indicate that oxidative modification can directly regulate AMPK activity in liver cells,  
101 thus activating downstream signaling pathways to regulate glucose and lipid metabolism.  
102 However, it is unclear why both antioxidant intervention and ROS produced by exercise can  
103 promote the seemingly contradictory phenomenon of AMPK activation. Moderate exercise  
104 has been proved significantly elevate systemic oxidative stress. At the same time,  
105 endogenous antioxidant defences also increased to counteract increased levels of ROS  
106 induced by exercise, leading to a higher level of redox balance(27). Thus, we hypothesized  
107 that both antioxidants and exercise could reach either high-level or low-level redox balance  
108 in diabetic individuals. Moreover, the activity and expression of AMPK might be a marker  
109 of redox balance *in vivo*.

110 Hence, the present study was designed to understand the different mechanisms of exercise  
111 and antioxidant intervention in diabetes and verify the activation of hepatic AMPK as a  
112 hallmark of dynamic redox balance. Firstly, we utilized the streptozotocin-high fat diet (STZ-  
113 HFD) induced type 2 diabetic (T2DM) model in rats to clarify the hepatic redox status in  
114 T2DM rats after the exercise or antioxidant intervention. Then, according to the exercise  
115 intensity and mode, we divided the exercise groups into three modes and found that AMPK  
116 activation could serve as a biomarker of redox balance and moderate exercise in diabetic

117 treatment. Taken together, in this study, we found that AMPK activation and expression  
118 could reflect the threshold of exercise or antioxidant administration for diabetes treatment. It  
119 provides a theoretical basis for the precise regulation of diabetes by antioxidants and exercise.

120

## 121 **Results**

122

### 123 **1. Exercise promotes antioxidant levels through producing ROS, leading to a high level** 124 **of REDOX balance in the liver.**

125 To investigate the hepatic redox regulation in diabetes after exercise intervention, we  
126 established the T2DM rat model by feeding HFD followed by a low dose of STZ injection  
127 (35 mg/kg). The exercise intervention was started from Day 0 to Day 28 (Fig. 1A). According  
128 to previous studies, the initial speed of exercise was 15 m/min, and the speed was increased  
129 by 3 m/min every 5 min. After the speed reached 20 m/min, the speed was maintained for  
130 another 60 min with slope of 5%. The exercise intensity was 64%-76%  $VO_{2max}$  (28). The  
131 low-intensity continuous exercise (CE) can be regarded as aerobic exercise.

132 Firstly, we detect the expression of antioxidant enzymes and oxidase in liver tissue. As redox  
133 proteins regulate the redox state *in vivo*, the protein expression of GRX and TRX were found  
134 to be up-regulated during exercise intervention (Fig. 1B-E). Notably, the PRX expression  
135 also showed a trend of increase (Fig. 1B-C). Parallely, the expressions of NADPH oxidase  
136 4 (NOX4) and cyclooxygenase 2 (COX2) in the liver were also significantly up-regulated in  
137 the exercise group (Fig. 1F-H). Protein carbonylation is a type of protein oxidation that can  
138 be promoted by ROS. However, we found that the exercise group did not decrease the protein  
139 carbonylation level (Fig. 1I). As shown in Fig. 1J-K, the acetylation level of MnSOD also  
140 shows an increase in the exercise group, indicating the inactivation of mitochondrial  
141 MnSOD. MDA, a biomarker of lipid peroxidation, was also significantly up-regulated in the  
142 diabetic group but decreased in exercise group (Fig. 1L). Meanwhile, specific markers related  
143 to kidney dysfunction, such as the blood urea nitrogen (BUN) level, were also significantly  
144 increased in the diabetic rat group. Exercise intervention reduced the BUN level (Fig. 1M).  
145 These results indicated that the high ROS production in the exercise group could  
146 compensatory increase the antioxidant status to avoid oxidative damage. It suggests that  
147 exercise can promote redox to reach a high level of balance, therefore ROS produced by  
148 exercise does not lead to oxidative damage.

149 **2. Antioxidant intervention alleviates blood glucose through reducing oxidative stress,**  
150 **leading to a low level of REDOX balance in the liver.**

151 Recent studies have suggested that NADPH oxidase is one of the primary sources of ROS  
152 (29). Apocynin has already been characterized as an NADPH oxidase inhibitor in the early  
153 1980s, and it can also act as an antioxidant (30). Our previous study showed that apocynin  
154 intervention alleviated blood glucose by inhibiting oxidative products. Compared with the  
155 exercise intervention, the antioxidant intervention was also started from Day 0 to D28 in this  
156 study (Fig. 2A). We found that apocynin intervention decreased the protein carbonylation  
157 level and MDA level in the liver (Fig. 2B-C). Also, the TAOC level increased after apocynin  
158 treatment (Fig. 2D). The random blood glucose and oral glucose tolerance (2 h after oral  
159 glucose, OGTT) decreased in the apocynin intervention group compared with the diabetic rat  
160 group (Fig. 2F-G). Consistent with the apocynin intervention group, the exercise group also  
161 showed lower random blood glucose levels and 2h OGTT (Fig. 2H-I). These studies indicated  
162 that the apocynin treatment inhibited the protein oxidative damage and alleviated blood  
163 glucose.

164 **3. Moderate exercise-generated ROS production promotes phosphorylated activation**  
165 **of AMPK and reduces blood glucose level, while excessive exercise- generated oxidative**  
166 **stress reduces AMPK expression and exacerbates diabetes.**

167 In order to find out the biomarkers that could reflect moderate exercise to improve blood  
168 glucose control, diabetic rats were divided into short-term continuous exercise (CE),  
169 intermittent exercise (IE), and excessive exercise (EE) according to the exercise intensity and  
170 mode (28). We found that the random blood glucose and 2h OGTT in CE and IE treated  
171 diabetic rats decreased (Fig. 2A-B). In contrast, EE intervention did not improve blood  
172 glucose but increased random and 2h OGTT, without statistical significance (Fig. 3A-B).  
173 Next, we detected the expression of antioxidant enzyme and oxidase in the liver tissue of  
174 exercise-treated T2D rats. Hepatic MDA concentration showed significant up-regulation in  
175 the diabetic group but a decrease in continuous and intermittent exercise (Fig.3D). We found  
176 that the CE group did not obviously change the protein carbonylation level. However, the EE  
177 intervention promoted the protein carbonylation in the liver, indicating the mode of action is  
178 not free radical scavenging but ROS production (Fig.3E).

179 The ROS-generating NADPH oxidases (NOXs) have been recognized as one of the main  
180 sources of ROS production in cells (31). Cyclooxygenase 2 (COX2) activity could also act  
181 as a stimulus for ROS production (32). The increase of NOX4 and COX2 in the EE group  
182 indicated the highest oxidation level (Fig. 3K-L). As shown in Fig. 3F-G, although the  
183 acetylation level of MnSOD was found to increase significantly in the CE and EE group,  
184 which presented the inactivation of MnSOD, the antioxidant enzyme GRX and TRX were  
185 found to be up-regulated during CE intervention (Fig. 3I-J). Thus, the CE intervention  
186 maintains a high-level balance of redox state. Considering the decrease of antioxidant  
187 enzymes in the EE group, the REDOX balance in EE group was disrupted. Therefore, MDA  
188 in the CE group did not increase, while the increased MDA in the EE group indicated  
189 oxidative damage (Fig. 3D). Among these three exercise modes, the IE group showed the  
190 lowest level of oxidation (the minor increase in COX and a slight decrease in carbonylation).  
191 Although the levels of antioxidant enzymes such as GRX, TRX, and PRX did not increase,  
192 the activity of MnSOD also increased significantly (the level of acetylation decreased) (Fig.  
193 3F). The reduction of MDA level also indicates IE group did not form oxidative damage (Fig.  
194 3D), indicating the IE group could also maintain a relatively high level of redox balance.

195 Notably, the phosphorylation of AMPK showed different patterns in three kinds of exercise,  
196 among which both CE and IE intervention could promote the phosphorylation of AMPK  
197 compared to the diabetic rats (Fig. 3O-P). EE intervention did not increase the content of  
198 AMPK phosphorylation, which might be caused by the reduction of AMPK level.  
199 Meanwhile, the ratio of AMP to ATP was detected, and exercise-activated AMPK did not  
200 exhibit AMP-dependent characteristics at this time (Fig. 3N). These results suggested that  
201 moderate exercise-generated ROS may directly promote AMPK phosphorylation activation  
202 (independent of AMP upregulation) and reduce blood and liver glucose levels. However,  
203 excessive exercise-generated oxidative stress reduces AMPK expression and exacerbates  
204 diabetes.

#### 205 **4. Moderate exercise promoted glycolysis and mitochondrial tricarboxylic acid cycle in** 206 **the liver of diabetic rats.**

207 Next, we further explored the mechanism by which inhibiting blood glucose during CE and  
208 IE intervention. Fructose-2,6-diphosphate (F-2,6-P<sub>2</sub>; also known as F-2,6-BP), which is a  
209 product of the bifunctional enzyme 6-phosphofructose 2-kinase/fructose 2,6-diphosphatase  
210 2 (PFK/FBPase 2, also known as PFKFB2), is a potent regulator of glycolytic and

211 gluconeogenic flux. The phospho-PFKFB2 to PFKFB2 ratio represents the glycolytic rate.  
212 A high ratio of phospho-PFKFB2:PFKFB2 leads to an increase in the F-2,6-P2 level and the  
213 allosteric activation of phosphor-fructose kinase 1 (PFK1), while a low ratio leads to a  
214 decrease in F-2,6-P2 and an increase in gluconeogenesis (33). The overexpression of  
215 bifunctional enzymes in mouse liver can reduce blood glucose levels by inhibiting hepatic  
216 glucose production (34). Therefore, bifunctional enzymes are also a potential target for  
217 reducing hepatic glucose production. In our study, the p-PFK2:PFK2 ratio decreased in the  
218 diabetic rats but was enhanced by CE and IE intervention (Fig. 4A-C), suggesting that CE  
219 and IE could reverse gluconeogenesis to glycolysis by enhancing PFK/FBPase. Meanwhile,  
220 the substrates of the glycolytic pathway (such as DHAP, Fig. 4D) and the tricarboxylic acid  
221 cycle (such as citrate, succinate and malate, Fig. 4D) showed an upward trend. These results  
222 illustrated that moderate exercise promoted glucose catabolism in the liver of diabetic rats  
223 (Fig. 4E).

## 224 **5. Moderate exercise inhibited hepatic mitophagy, while excessive exercise promoted** 225 **hepatic mitophagy and inhibited the mitochondrial biogenesis.**

226 The electron transport associated with the mitochondrial function is considered the major  
227 process leading to ROS production during exercise (35). To further explore the downstream  
228 signal of AMPK activation in moderate and excessive exercise, we detected the protein  
229 expression of mitochondrial dynamic and mitochondrial biogenesis. According to the result  
230 in Figure 5A-E, we found that the mitochondrial fusion protein MFN significantly decreased  
231 in the liver of the excessive exercise group, and the mitochondrial fission protein (Fis) and  
232 autophagy-related protein ATG5 and LC3B did not change, compared with the diabetic  
233 group. Notably, the ATG5 and LC3B levels decreased in the CE and IE group, compared  
234 with the diabetic group (Fig. 5A-E). PGC1 $\alpha$  is a transcriptional coactivator, a central inducer  
235 of mitochondrial biogenesis in cells (36). The expression of PGC1 $\alpha$  increased in the CE and  
236 IE group, but not in the EE group (Fig. 5F). These results indicated that moderate exercise  
237 ameliorated mitochondrial biogenesis and autophagy in the liver. However, excessive  
238 exercise aggravated mitochondrial fission and did not exhibit autophagy alleviation.  
239 Parallely, the mitochondria structure of the live tissue in the EE group is fragmented and  
240 showed greatly diminished cristae and swelling matrix under transmission electron  
241 microscopy, which is functionally reflected as a defect in oxidative phosphorylation.  
242 However, the CE and IE group showed increased numbers of cristae and a clear structure of



243 mitochondrial cristae (Fig. 5H). These results all show that the *in vivo* mitochondrial ROS  
244 burst caused by excessive exercise inhibits the expression of AMPK and promotes  
245 mitophagy. The damage to the mitochondrial dynamics and structure in liver tissue leads to  
246 abnormal aerobic oxidation, thereby aggravating diabetes.

## 247 **6. ROS differentially regulated AMPK activation through GRX-mediated** 248 **glutathionylation within redox balance threshold**

249 To further elucidate the relationship between redox balance and AMPK activation in cellular  
250 environment, L02 cells were intervened with different concentrations of H<sub>2</sub>O<sub>2</sub> (50-200  
251 μmol/l) to mimic the different ROS levels *in vivo* (Fig. 6A). We found the expression of 3-  
252 NT and 4-HNE increased after H<sub>2</sub>O<sub>2</sub> intervention (100-200 μmol/l, Fig. 6B). The acetylation  
253 level of Mn-SOD also increased after H<sub>2</sub>O<sub>2</sub> intervention (Fig. 6C). Significantly, oxidative  
254 stress marker 3-nitrotyrosine (3-NT) level highly increased at the concentration of 200  
255 μmol/l, indicating the H<sub>2</sub>O<sub>2</sub> intervention at 200 μmol/l exceeded the threshold of redox  
256 balance, thus causing oxidative damage. Our previous study shows that optimal ROS would  
257 activate AMPK through GRX-mediated S-glutathionylation (26). As shown in Fig. 6D-F,  
258 exposure to 50 and 100 μmol/l H<sub>2</sub>O<sub>2</sub> led to an increase of GSS-protein adduct, concomitant  
259 with the AMPK phosphorylation and glutathionylation (Fig. 6E-F), suggesting that the ROS  
260 level within redox balance threshold could induce glutathionylation and phosphorylation of  
261 AMPK. However, when the concentration of ROS was too high to exceed the redox balance  
262 threshold, the AMPK protein would be partially degraded, thereby inhibiting its activity.  
263 Exposure to 200 μmol/l H<sub>2</sub>O<sub>2</sub> led to a decrease in AMPK glutathionylation, phosphorylation  
264 as well as protein content (Fig. 6D-F). These results indicated that the increased ROS within  
265 the redox balance threshold could promote the AMPK activation through GRX-mediated S-  
266 glutathionylation.

267 At the same time, we also detected the substrates of glycolysis and aerobic oxidation at  
268 different concentrations of H<sub>2</sub>O<sub>2</sub>. We found the exposure to 20-100 μmol/l H<sub>2</sub>O<sub>2</sub>, which made  
269 cells within the redox balance threshold, showed a trend of increase on glycolysis and aerobic  
270 oxidation substrates, indicating the increase of hepatic glucose catabolism (data not shown).

271

## 272 **Discussion**

273

274 It is known that both antioxidants and exercise can substantially benefit and ameliorate  
275 hyperglycaemia through ROS-mediated mechanisms in diabetes patients. However,  
276 antioxidant intervention reduces oxidative stress, while exercise produces ROS. The  
277 differences in redox mechanism between these two opposite approaches to diabetes treatment  
278 have not been fully explored. Therefore, it is still unclear how to use exercise and antioxidants  
279 scientifically and rationally to treat diabetes effectively.

280 The remission of diabetes by antioxidant intervention has been well documented. Some  
281 compounds in food that have a vigorous antioxidant activity or inhibit NADPH oxidase, such  
282 as polyphenols and flavonoids (37), have been confirmed to improve blood glucose and  
283 relieve type 2 diabetes in animal experiments. Several clinical trials also demonstrated the  
284 relief of antioxidants in diabetic hyperglycaemia (38, 39). Our previous study found hepatic  
285 mitochondrial ROS scavenger and antioxidant substances inhibited the oxidative products  
286 such as MDA and 4-HNE in diabetic mice and rats and benefitted blood glucose control (18).  
287 These evidence indicates that reducing the oxidative level of diabetic animals could treat  
288 diabetes. Hepatic AMPK regulates cellular and whole-body energy homeostasis, signals to  
289 stimulate glucose uptake in skeletal muscles, fatty acid oxidation in adipose (and other)  
290 tissues, and reduces hepatic glucose production (40, 41). Numerous pharmacological agents  
291 (including the first-line oral drug metformin), natural compounds, and hormones are known  
292 to activate AMPK (42-45). Moreover, our previous found that antioxidant (apocynin)  
293 intervention in diabetic rats could promote the phosphorylation and activation of AMPK  
294 protein, thereby regulating hepatic glucose metabolism (46). Taken together, we found that  
295 the activation of AMPK by antioxidant intervention was accompanied by a decrease in  
296 oxidative stress level in diabetic rats, resulting in a low level of redox balance to benefit  
297 diabetic hyperglycaemia.

298 Many medical research and public health recommendations support regular exercise to  
299 mitigate symptoms of many diseases, including psychiatric, neurological, metabolic,  
300 cardiovascular, pulmonary, musculoskeletal, and even cancer (47). John Holloszy's studies  
301 found that exercise improved insulin sensitivity in patients with type 2 diabetes and provided  
302 a better understanding of how muscle adapts to endurance exercise (19-21, 48-50). Although  
303 the benefits of exercise are irrefutable, excessive exercise is harmful (8). It is unclear how to  
304 control the amount and intensity of exercise. Recently, Chrysovalantou et al. found that  
305 NADPH oxidase 4 (NOX4) is a crucial protein of exercise to regulate adaptive responses and



306 prevent insulin resistance (51). We found that exercise can indeed increase NOX expression,  
307 but NOX is also upregulated in excessive exercise. Although Chrysovalantou's research puts  
308 more emphasis on the role of the redox environment in exercise, the biomarkers of moderate  
309 exercise for diabetes remain uncertain. In this study, according to the exercise intensity and  
310 mode, we divided the exercise groups into three modes: CE, IE and EE. We found that  
311 moderate exercise (including CE and IE) promoted hepatic ROS production and up-regulated  
312 a compensatory increase in antioxidant capability, forming a higher level balance of redox  
313 state. However, excessive exercise increases mitochondrial oxidative stress level and cause  
314 oxidative damage, which is not beneficial for glycaemic control in diabetes.

315 During exercise, the activation of AMPK in skeletal muscle was considered mainly caused  
316 by the increase of intracellular AMP:ATP ratio and phosphorylation of Thr172 on the  
317 "activation loop"7 of the  $\alpha$ -subunit (52). The activation of AMPK leads to the inhibition of  
318 mTORC1 activity and activation of PGC-1 $\alpha$ , thereby enhancing mitochondrial biogenesis  
319 (53). Early studies clarified that the activation of AMPK is related to the liver energy state  
320 during exercise (54). There are some papers against the role of AMPK in regulating glucose  
321 uptake during exercise (55-57), but these studies mainly focused on skeletal muscle glucose  
322 uptake but not the liver. Although the glucose was uptake by primarily skeletal muscle after  
323 exercise, the liver is prominent in whole-body glucose tolerance (58). Increasing evidence  
324 showed that AMPK is a redox-sensitive protein, and its cysteine 299 and 304 sites are likely  
325 to be regulated by the oxidation of hydrogen peroxide (23, 59, 60). Thus, the phosphorylation  
326 of AMPK might be directly activated through ROS regulation during exercise, not only  
327 depending on the increase of AMP. Our previous study found that both oxidation and  
328 reduction can promote AMPK activation (26), actually, this is because the redox balance  
329 state induced by oxidation or reduction intervention activates AMPK. In this study, we  
330 demonstrates that both antioxidant intervention and moderate exercise can activate AMPK  
331 oxidative phosphorylation while achieving redox balance, of which antioxidant intervention  
332 achieves a low-level redox balance and moderate exercise achieves a high-level redox  
333 balance.

334 Our study, for the first time, found hepatic AMPK activation could act as a biomarker of  
335 dynamic redox balance during exercise to benefit glycaemic control in diabetic rats. Different  
336 intensities of exercise-induced ROS production could profoundly alter the cellular redox  
337 microenvironment and directly regulate the activity and expression of hepatic AMPK

338 through a redox-related mechanism. Moderate exercise (including CE and IE) appropriately  
339 promotes oxidation in the liver, thus, compensatory promotes the level of reduction, forming  
340 a high level of redox balance. Excessive exercise producing ROS exceeding the redox  
341 threshold caused oxidative damage with a significant increase in MDA and urea nitrogen  
342 levels. Specifically, optimal ROS directly promoted AMPK activation via glutathionylation  
343 and upregulated glycolysis and aerobic oxidation in L02 cells, which was consistent with the  
344 animal experiments. However, excessive ROS inhibits the activity and expression of AMPK  
345 in L02 cells, which might be related with the oxidative stress induced protein degradation  
346 (Fig. 7). Accordingly, we speculate that the antioxidant intervention based on moderate  
347 exercise might offset the effect of exercise, but the antioxidant intervention after excessive  
348 exercise could restore redox balance. In addition, the number of mitochondria and the  
349 function of aerobic oxidation in the IE group was significantly higher than those in the CE  
350 group. In the EE group, the autophagy and fission of liver mitochondria are also up-regulated.  
351 These results indicate that the phosphorylation and expression of AMPK can act as a sensitive  
352 biomarker during exercise in diabetic rats, reflecting the threshold of redox balance and the  
353 range of exercise appropriateness.

354 Together, our results illustrate the different regulatory mechanisms of exercise and  
355 antioxidant intervention on redox balance and blood glucose level in diabetes. Moderate  
356 exercise promoted hepatic ROS production and up-regulated a compensatory increase  
357 antioxidant capability, forming a high-level balance of redox state. In contrast, antioxidant  
358 intervention scavenged the hepatic free radical to form a delicate low-level balance of redox  
359 state. Moreover, excessive exercise led to redox imbalance due to excess ROS levels. Hepatic  
360 AMPK activation could act as a sign and hallmark of moderate exercise and dynamic redox  
361 balance to guide appropriate exercise or antioxidant intervention. These results illustrate that  
362 it is necessary to develop a moderate exercise program according to the REDOX  
363 microenvironment of diabetes patients and provide theoretical evidence for the precise  
364 regulation of diabetes by antioxidants and exercise.

365

## 366 **Materials and Methods**

367

### 368 **1. Materials**

369 T-AOC kit was supplied by Changzhou Redox Biological Technology Corporation (Jiangsu  
370 , CN). Antibodies against Actin, Acetylated-Lysine, P-PFK2, Ace-SOD2, ATG5, LC3A/B,  
371 GAPDH, MFN1 and IgG-HRP were purchased from Cell Signaling Technology (USA).  
372 Antibodies against CAT, PRX1, AMPKa1, GRX1, GRX2, SOD2, HSP90, COX1, COX2  
373 and PFK2 were purchased from ProteinTech (Wuhan, CN). Antibodies against 3-NT, 4HNE,  
374 NOX4 and PGC1- $\alpha$  were purchased from Abcam. Antibodies against p-AMPK $\alpha$ 1/ $\alpha$ 2 were  
375 purchased from SAB (Signalway Antibody, USA). The detailed antibody information is  
376 shown in Supplementary Table S1. High-fat diet (HFD) were purchased from Shanghai  
377 SLRC laboratory animal Company Ltd (Shanghai, China) and the nutritional composition is  
378 shown in Supplementary Table S2.

379

## 380 **2. Animal**

381 Male SD rats (150–160 g body weight, 6-8 weeks) were purchased from Fudan University  
382 Animal Center (Shanghai, China). All animal care and experimental procedures were  
383 approved by the Fudan University Institutional Laboratory Animal Ethics Committee (NO.  
384 20170223-123). Animals were housed in a pathogen free environment with 12 h dark/light  
385 cycles.

386

## 387 **3. Establishment of diabetic rat model**

388 Rats were divided into six groups in a non-blinded, randomized manner: Control (Ctl),  
389 STZ+HFD diabetic rat (T2D), Continuous exercise+STZ+HFD diabetic rat (T2D+CE),  
390 intermittent exercise+STZ+HFD diabetic rat (T2D+IE), excessive exercise+STZ+HFD  
391 diabetic rat (T2D+EE) and Apocynin+STZ+HFD diabetic rat (T2D+APO) (n=8 per group).  
392 The sample size was calculated according to the Power Curve. The diabetic rats model was  
393 established by 12hr-fasting followed by intraperitoneal injection of 0.1 M streptozotocin  
394 (STZ) citrate solution (pH 4.5) at a dose of 35 mg/kg for Day1, and 35 mg/kg for Day 2 at  
395 the 5<sup>th</sup> week. The HFD was started from the 1<sup>st</sup> week to the 8<sup>th</sup> week. After 8 weeks of  
396 intervention, the mice were sacrificed. The tissues and plasma were collected and preserved  
397 at –80 °C for further analysis.

398 Rat were acclimated to treadmill running for 3 days before the initiation of the experiments  
399 and the exercise training intervention was continued for 4 weeks (5 times per week). All  
400 animals were randomized before the initiation of exercise tests.

401 *Continuous exercise:*

402 The initial speed was 15 m/min, and the speed was increased by 3 m/min every 5 min. After  
403 the speed reached 20 m/min, the speed was maintained for another 60 min with slope of 5%.  
404 The exercise intensity was 64%-76%  $VO_{2max}$  (28, 61, 62).

405 *Intermittent exercise:*

406 The initial speed was 15 m/min, and the speed was increased by 3 m/min every 5 min. After  
407 the speed reached 20 m/min, the speed was maintained for 20 min and then 5 min rest at 5  
408 m/min. The training was continued for 3 times, and the total running time is 60 min with two  
409 5 min rest with slope of 5%.

410 *Excessive exercise:*

411 The initial speed was 15 m/min, and the speed was increased by 3 m/min every 5 min. After  
412 the speed reached 50 m/min, the speed was maintained for another 60 min with slope of 5%.  
413 The exercise intensity was higher than 80%  $VO_{2max}$ .

414 OGTT was performed in the fasting mice with intraperitoneal injection of glucose at 1 g/kg  
415 of body weight, and glucose was measured at 15min, 30 min, 60 min and 120 min,  
416 respectively. Blood glucose was determined by glucometer (Roche, Switzerland).

417

#### 418 **4. Cell culture**

419 Normal Human Hepatic Cell Line L02 cells (Cell Bank of Chinese Academy of Sciences)  
420 were grown in DMEM supplemented with 10% FBS (GIBCO, USA) in a humidified  
421 incubator (Forma Scientific) at 37 °C and 5%  $CO_2$  as described previously. The medium were  
422 supplemented with 10% FBS (GIBCO, USA), 2 mmol/l glutamine, 1 mmol/l sodium  
423 pyruvate, 10 mmol/l HEPES, 50  $\mu$ mol/l  $\beta$ -mercaptoethanol, 105 U/l penicillin and  
424 streptomycin. Glutamine and sodium pyruvate were purchased from Sinopharm Chemical  
425 Reagent Co., Ltd, HEPES were purchased from Beyotime Biotechnology (Shanghai, CN).  
426 All cell lines used in the study were tested for mycoplasma and were STR profiled.

427

#### 428 **5. Flow cytometry**

429 For measurement of intracellular Superoxide and  $H_2O_2$ , hepatocytes were stained with 5  $\mu$ M  
430 hydroethidine (superoxide indicator) and 10  $\mu$ M  $H_2DCFDA$  (Thermo Fisher Scientific,

431 USA). Stained cells were analyzed with NovoCyte Quanteon flow cytometer (Agilent  
432 Technologies, Inc.), and acquired data were analyzed with NovoExpress software (Agilent  
433 Technologies, Inc.) and FlowJo software (TreeStar, Ashland, OR).

434

#### 435 **6. ATP and AMP content analysis**

436 Liver tissue (20–30 mg) were homogenized on ice by perchloric acid. Homogenized samples  
437 were centrifuged for 12,000 rpm at 4 °C (30 min). Supernatant was then neutralized with 4  
438 M K<sub>2</sub>CO<sub>3</sub>, followed by further centrifugation for 12,000 rpm at 4 °C for 20 min. Supernatant  
439 was obtained for the determination of ATP and AMP content by high performance liquid  
440 chromatography (HPLC). The detection wavelength was 254 nm.

441

#### 442 **7. Metabolite profiling detection**

443 Cellular metabolites were extracted and analysed by LC-MS/MS. Ferulic acid was added as  
444 an internal standard to metabolite extracts, and metabolite abundance was expressed relative  
445 to the internal standard and normalized to cell number. Mass isotopomer distribution was  
446 determined by LC-MS/MS (AB SCIEX Triple-TOF 4600) with selective reaction monitoring  
447 (SRM) in positive/negative mode

448

#### 449 **8. Western blot analysis**

450 Cells and tissues were lysed in a buffer containing 1% Nonidet P-40, 0.25% sodium  
451 deoxycholate, 150 mmol/l NaCl, 10 mmol/l Tris, 1 mmol/l EGTA, 1% proteinase and  
452 phosphatase inhibitor cocktails (Sigma-Aldrich) at 4 °C for 30 min. Cell lysates were  
453 resolved by sodium dodecyl sulfate-polyacrylamide (SDS-PAGE) gel electrophoresis,  
454 transferred to polyvinylidene fluoride (PVDF) membranes, and immunoblotted with primary  
455 antibodies. Membranes were incubated with HRP-conjugated secondary antibodies and  
456 visualized using chemiluminescent substrate (ECL; Tanon, CN) and Tanon-5200  
457 Chemiluminescent Imaging System (Tanon, CN).

458

#### 459 **9. Transmission electron microscope (TEM)**

460 Rat liver tissue (1 mm\*1 mm) were fixed by paraformaldehyde. The samples were examined  
461 with a Jeol Jem-100SV electron microscope (Japan) which was operated at 80 Kv after fixed  
462 by 3% glutaraldehyde in 0.1 M phosphate buffer (pH 7.3) at Institute of Electron microscopy,  
463 Shanghai Medical College of Fudan University.

464

## 465 **10. Statistics**

466 The experimental data were expressed as mean  $\pm$  SEM. One-way ANOVA was used to  
467 compare among groups. Data analysis was conducted by Graphpad prism 9 statistical  
468 analysis software.  $p < 0.05$  was considered statistically significant. Data are expressed as  
469 means  $\pm$  SEM;  $n = 3$  for cells experiment ( $n = 3$  represents three times of individual  
470 experiment);  $n = 8$  for animal experiment.

471

## 472 **Acknowledgments**

473 The authors thank Dr. Xiaodong Zhang from Chengdu Brilliant Pharmaceuticals for his proof  
474 reading and editing of the manuscript. The authors are also indebted to Dr. Rutan Zhang and  
475 Prof. Liang Qiao from Fudan University, for analysis of LC-MS/MS data. The authors thank  
476 Mr. Yipei He, Dr. Xiao Zhang, Mrs Lihan Jiang, Mr. Kelei Dong for their assistance in animal  
477 experiments. The authors are also indebted to Institute of Electronmicroscopy from Fudan  
478 University, for the help on electronmicroscopy analysis.

479 This work was supported by grants from the National Natural Science Foundation of China  
480 (Grants No. 31770916).

481

## 482 **Author contributions:**

483 M.W., A.Z., C.Y., X.L., C.Z. and Q.L. conducted experiments. L.S. and D.S designed the  
484 experiments and analyzed data. Y.F. and F.X. provided professional consultation on exercise  
485 mode. H.G. provided professional suggestion on electronmicroscopy analysis. L.S. and D.S.  
486 supervised the project and wrote the manuscript.

487

## 488 **Competing interests:**

489 All other authors declare they have no competing interests

490



491 **Data and materials availability:**

492 All data are available in the main text or the supplementary materials.

493

494 **References**

- 495 1. K. Ogurtsova *et al.*, IDF diabetes Atlas: Global estimates of undiagnosed diabetes in  
496 adults for 2021. *Diabetes Res Clin Pract* **183**, 109118 (2022).
- 497 2. A. H. Heald *et al.*, Estimating life years lost to diabetes: outcomes from analysis of  
498 National Diabetes Audit and Office of National Statistics data. *Cardiovasc*  
499 *Endocrinol Metab* **9**, 183-185 (2020).
- 500 3. J. C. N. Chan *et al.*, The Lancet Commission on diabetes: using data to transform  
501 diabetes care and patient lives. *Lancet* **396**, 2019-2082 (2021).
- 502 4. C. Iacobini, M. Vitale, C. Pesce, G. Pugliese, S. Menini, Diabetic Complications and  
503 Oxidative Stress: A 20-Year Voyage Back in Time and Back to the Future.  
504 *Antioxidants (Basel)* **10**, (2021).
- 505 5. J. P. Kirwan, J. Sacks, S. Nieuwoudt, The essential role of exercise in the management  
506 of type 2 diabetes. *Cleve Clin J Med* **84**, S15-S21 (2017).
- 507 6. J. S. Bhatti *et al.*, Oxidative stress in the pathophysiology of type 2 diabetes and  
508 related complications: Current therapeutics strategies and future perspectives. *Free*  
509 *Radic Biol Med* **184**, 114-134 (2022).
- 510 7. K. I. Stanford, L. J. Goodyear, Exercise and type 2 diabetes: molecular mechanisms  
511 regulating glucose uptake in skeletal muscle. *Adv Physiol Educ* **38**, 308-314 (2014).
- 512 8. M. Flockhart *et al.*, Excessive exercise training causes mitochondrial functional  
513 impairment and decreases glucose tolerance in healthy volunteers. *Cell Metab* **33**,  
514 957-970 e956 (2021).
- 515 9. P. S. Brady, L. J. Brady, D. E. Ullrey, Selenium, vitamin E and the response to  
516 swimming stress in the rat. *J Nutr* **109**, 1103-1109 (1979).
- 517 10. C. J. Dillard, R. E. Litov, W. M. Savin, E. E. Dumelin, A. L. Tappel, Effects of  
518 exercise, vitamin E, and ozone on pulmonary function and lipid peroxidation. *J Appl*  
519 *Physiol Respir Environ Exerc Physiol* **45**, 927-932 (1978).
- 520 11. T. Ashton *et al.*, Electron spin resonance spectroscopic detection of oxygen-centred  
521 radicals in human serum following exhaustive exercise. *Eur J Appl Physiol Occup*  
522 *Physiol* **77**, 498-502 (1998).
- 523 12. S. K. Powers, M. J. Jackson, Exercise-induced oxidative stress: cellular mechanisms  
524 and impact on muscle force production. *Physiol Rev* **88**, 1243-1276 (2008).
- 525 13. S. K. Powers, W. B. Nelson, M. B. Hudson, Exercise-induced oxidative stress in  
526 humans: cause and consequences. *Free Radic Biol Med* **51**, 942-950 (2011).
- 527 14. J. H. Traverse *et al.*, Measurement of myocardial free radical production during  
528 exercise using EPR spectroscopy. *Am J Physiol Heart Circ Physiol* **290**, H2453-2458  
529 (2006).
- 530 15. J. D. Watson, Type 2 diabetes as a redox disease. *Lancet* **383**, 841-843 (2014).
- 531 16. R. Rahimi, S. Nikfar, B. Larijani, M. Abdollahi, A review on the role of antioxidants  
532 in the management of diabetes and its complications. *Biomed Pharmacother* **59**, 365-  
533 373 (2005).
- 534 17. M. Wu *et al.*, Liver-targeted Nano-MitoPBN normalizes glucose metabolism by  
535 improving mitochondrial redox balance. *Biomaterials* **222**, 119457 (2019).
- 536 18. M. Wu *et al.*, Compartmentally scavenging hepatic oxidants through AMPK/SIRT3-  
537 PGC1alpha axis improves mitochondrial biogenesis and glucose catabolism. *Free*  
538 *Radic Biol Med* **168**, 117-128 (2021).

- 539 19. J. O. Holloszy, Exercise-induced increase in muscle insulin sensitivity. *J Appl Physiol*  
540 (1985) **99**, 338-343 (2005).
- 541 20. J. O. Holloszy, J. Schultz, J. Kusnierkiewicz, J. M. Hagberg, A. A. Ehsani, Effects of  
542 exercise on glucose tolerance and insulin resistance. Brief review and some  
543 preliminary results. *Acta Med Scand Suppl* **711**, 55-65 (1986).
- 544 21. J. S. Greiwe *et al.*, Effects of endurance exercise training on muscle glycogen  
545 accumulation in humans. *J Appl Physiol* (1985) **87**, 222-226 (1999).
- 546 22. B. Viollet *et al.*, Activation of AMP-activated protein kinase in the liver: a new  
547 strategy for the management of metabolic hepatic disorders. *J Physiol* **574**, 41-53  
548 (2006).
- 549 23. J. W. Zmijewski *et al.*, Exposure to hydrogen peroxide induces oxidation and  
550 activation of AMP-activated protein kinase. *J Biol Chem* **285**, 33154-33164 (2010).
- 551 24. Y. Ren *et al.*, Oxidative stress-mediated AMPK inactivation determines the high  
552 susceptibility of LKB1-mutant NSCLC cells to glucose starvation. *Free Radic Biol*  
553 *Med* **166**, 128-139 (2021).
- 554 25. S. A. Hawley *et al.*, Use of cells expressing gamma subunit variants to identify  
555 diverse mechanisms of AMPK activation. *Cell Metab* **11**, 554-565 (2010).
- 556 26. K. Dong *et al.*, Glutaredoxins concomitant with optimal ROS activate AMPK through  
557 S-glutathionylation to improve glucose metabolism in type 2 diabetes. *Free Radical*  
558 *Biology and Medicine* **101**, 334-347 (2016).
- 559 27. L. Parker, T. A. McGuckin, A. S. Leicht, Influence of exercise intensity on systemic  
560 oxidative stress and antioxidant capacity. *Clin Physiol Funct Imaging* **34**, 377-383  
561 (2014).
- 562 28. F. Qin *et al.*, Maximum oxygen consumption and quantification of exercise intensity  
563 in untrained male Wistar rats. *Sci Rep* **10**, 11520 (2020).
- 564 29. O. Lopez-Acosta *et al.*, Reactive Oxygen Species from NADPH Oxidase and  
565 Mitochondria Participate in the Proliferation of Aortic Smooth Muscle Cells from a  
566 Model of Metabolic Syndrome. *Oxid Med Cell Longev* **2018**, 5835072 (2018).
- 567 30. S. Heumuller *et al.*, Apocynin is not an inhibitor of vascular NADPH oxidases but an  
568 antioxidant. *Hypertension* **51**, 211-217 (2008).
- 569 31. A. Panday, M. K. Sahoo, D. Osorio, S. Batra, NADPH oxidases: an overview from  
570 structure to innate immunity-associated pathologies. *Cell Mol Immunol* **12**, 5-23  
571 (2015).
- 572 32. C. Burdon, C. Mann, T. Cindrova-Davies, A. C. Ferguson-Smith, G. J. Burton,  
573 Oxidative stress and the induction of cyclooxygenase enzymes and apoptosis in the  
574 murine placenta. *Placenta* **28**, 724-733 (2007).
- 575 33. D. A. Okar *et al.*, PFK-2/FBPase-2: maker and breaker of the essential biofactor  
576 fructose-2,6-bisphosphate. *Trends Biochem Sci* **26**, 30-35 (2001).
- 577 34. C. Wu, D. A. Okar, C. B. Newgard, A. J. Lange, Overexpression of 6-phosphofructo-  
578 2-kinase/fructose-2, 6-bisphosphatase in mouse liver lowers blood glucose by  
579 suppressing hepatic glucose production. *J Clin Invest* **107**, 91-98 (2001).
- 580 35. D. B. Zorov, M. Juhaszova, S. J. Sollott, Mitochondrial reactive oxygen species (ROS)  
581 and ROS-induced ROS release. *Physiol Rev* **94**, 909-950 (2014).
- 582 36. S. Austin, J. St-Pierre, PGC1alpha and mitochondrial metabolism--emerging  
583 concepts and relevance in ageing and neurodegenerative disorders. *J Cell Sci* **125**,  
584 4963-4971 (2012).
- 585 37. T. Nie, G. J. S. Cooper, Mechanisms Underlying the Antidiabetic Activities of  
586 Polyphenolic Compounds: A Review. *Front Pharmacol* **12**, 798329 (2021).
- 587 38. A. Movahed *et al.*, Efficacy and Safety of Resveratrol in Type 1 Diabetes Patients: A  
588 Two-Month Preliminary Exploratory Trial. *Nutrients* **12**, (2020).



- 589 39. A. F. Raimundo *et al.*, Combined effect of interventions with pure or enriched  
590 mixtures of (poly)phenols and anti-diabetic medication in type 2 diabetes  
591 management: a meta-analysis of randomized controlled human trials. *Eur J Nutr* **59**,  
592 1329-1343 (2020).
- 593 40. D. Garcia, R. J. Shaw, AMPK: Mechanisms of Cellular Energy Sensing and  
594 Restoration of Metabolic Balance. *Mol Cell* **66**, 789-800 (2017).
- 595 41. B. B. Zhang, G. Zhou, C. Li, AMPK: an emerging drug target for diabetes and the  
596 metabolic syndrome. *Cell Metab* **9**, 407-416 (2009).
- 597 42. M. Foretz, B. Guigas, B. Viollet, Understanding the glucoregulatory mechanisms of  
598 metformin in type 2 diabetes mellitus. *Nat Rev Endocrinol* **15**, 569-589 (2019).
- 599 43. I. Pernicova, M. Korbonits, Metformin--mode of action and clinical implications for  
600 diabetes and cancer. *Nat Rev Endocrinol* **10**, 143-156 (2014).
- 601 44. R. J. Shaw *et al.*, The kinase LKB1 mediates glucose homeostasis in liver and  
602 therapeutic effects of metformin. *Science* **310**, 1642-1646 (2005).
- 603 45. G. Zhou *et al.*, Role of AMP-activated protein kinase in mechanism of metformin  
604 action. *J Clin Invest* **108**, 1167-1174 (2001).
- 605 46. K. Dong *et al.*, ROS-mediated glucose metabolic reprogram induces insulin  
606 resistance in type 2 diabetes. *Biochemical and biophysical research communications*  
607 **476**, 204-211 (2016).
- 608 47. X. Luan *et al.*, Exercise as a prescription for patients with various diseases. *J Sport*  
609 *Health Sci* **8**, 422-441 (2019).
- 610 48. J. P. Kirwan, T. P. Solomon, D. M. Wojta, M. A. Staten, J. O. Holloszy, Effects of 7  
611 days of exercise training on insulin sensitivity and responsiveness in type 2 diabetes  
612 mellitus. *Am J Physiol Endocrinol Metab* **297**, E151-156 (2009).
- 613 49. M. A. Rogers *et al.*, Improvement in glucose tolerance after 1 wk of exercise in  
614 patients with mild NIDDM. *Diabetes Care* **11**, 613-618 (1988).
- 615 50. P. A. Hansen, L. A. Nolte, M. M. Chen, J. O. Holloszy, Increased GLUT-4  
616 translocation mediates enhanced insulin sensitivity of muscle glucose transport after  
617 exercise. *J Appl Physiol (1985)* **85**, 1218-1222 (1998).
- 618 51. C. E. Xirouchaki *et al.*, Skeletal muscle NOX4 is required for adaptive responses that  
619 prevent insulin resistance. *Sci Adv* **7**, eabl4988 (2021).
- 620 52. K. A. Coughlan, R. J. Valentine, N. B. Ruderman, A. K. Saha, AMPK activation: a  
621 therapeutic target for type 2 diabetes? *Diabetes Metab Syndr Obes* **7**, 241-253 (2014).
- 622 53. J. A. Hawley, M. Hargreaves, M. J. Joyner, J. R. Zierath, Integrative biology of  
623 exercise. *Cell* **159**, 738-749 (2014).
- 624 54. R. C. Camacho, E. P. Donahue, F. D. James, E. D. Berglund, D. H. Wasserman,  
625 Energy state of the liver during short-term and exhaustive exercise in C57BL/6J mice.  
626 *Am J Physiol Endocrinol Metab* **290**, E405-408 (2006).
- 627 55. G. K. McConell, It's well and truly time to stop stating that AMPK regulates glucose  
628 uptake and fat oxidation during exercise. *Am J Physiol Endocrinol Metab* **318**, E564-  
629 E567 (2020).
- 630 56. T. L. Merry, G. K. McConell, Do reactive oxygen species regulate skeletal muscle  
631 glucose uptake during contraction? *Exerc Sport Sci Rev* **40**, 102-105 (2012).
- 632 57. T. L. Merry, G. R. Steinberg, G. S. Lynch, G. K. McConell, Skeletal muscle glucose  
633 uptake during contraction is regulated by nitric oxide and ROS independently of  
634 AMPK. *Am J Physiol Endocrinol Metab* **298**, E577-585 (2010).
- 635 58. S. O. Warner, M. V. Yao, R. L. Cason, J. J. Winnick, Exercise-Induced Improvements  
636 to Whole Body Glucose Metabolism in Type 2 Diabetes: The Essential Role of the  
637 Liver. *Front Endocrinol (Lausanne)* **11**, 567 (2020).

- 638 59. E. C. Hinchy *et al.*, Mitochondria-derived ROS activate AMP-activated protein  
639 kinase (AMPK) indirectly. *J Biol Chem* **293**, 17208-17217 (2018).
- 640 60. D. Shao *et al.*, A redox-dependent mechanism for regulation of AMPK activation by  
641 Thioredoxin1 during energy starvation. *Cell Metab* **19**, 232-245 (2014).
- 642 61. T. G. Bedford, C. M. Tipton, N. C. Wilson, R. A. Oppliger, C. V. Gisolfi, Maximum  
643 oxygen consumption of rats and its changes with various experimental procedures. *J*  
644 *Appl Physiol Respir Environ Exerc Physiol* **47**, 1278-1283 (1979).
- 645 62. R. E. Shepherd, P. D. Gollnick, Oxygen uptake of rats at different work intensities.  
646 *Pflugers Arch* **362**, 219-222 (1976).
- 647

648 **Figure legend:**

649 **Graphic Abstract**

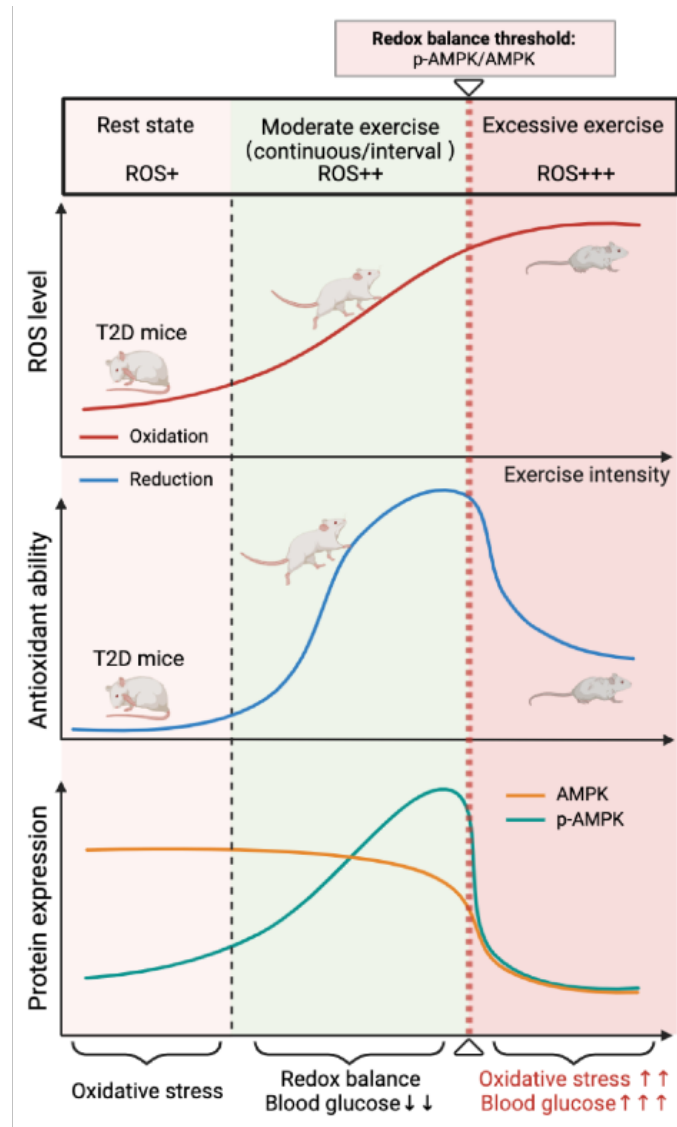

650

651

652

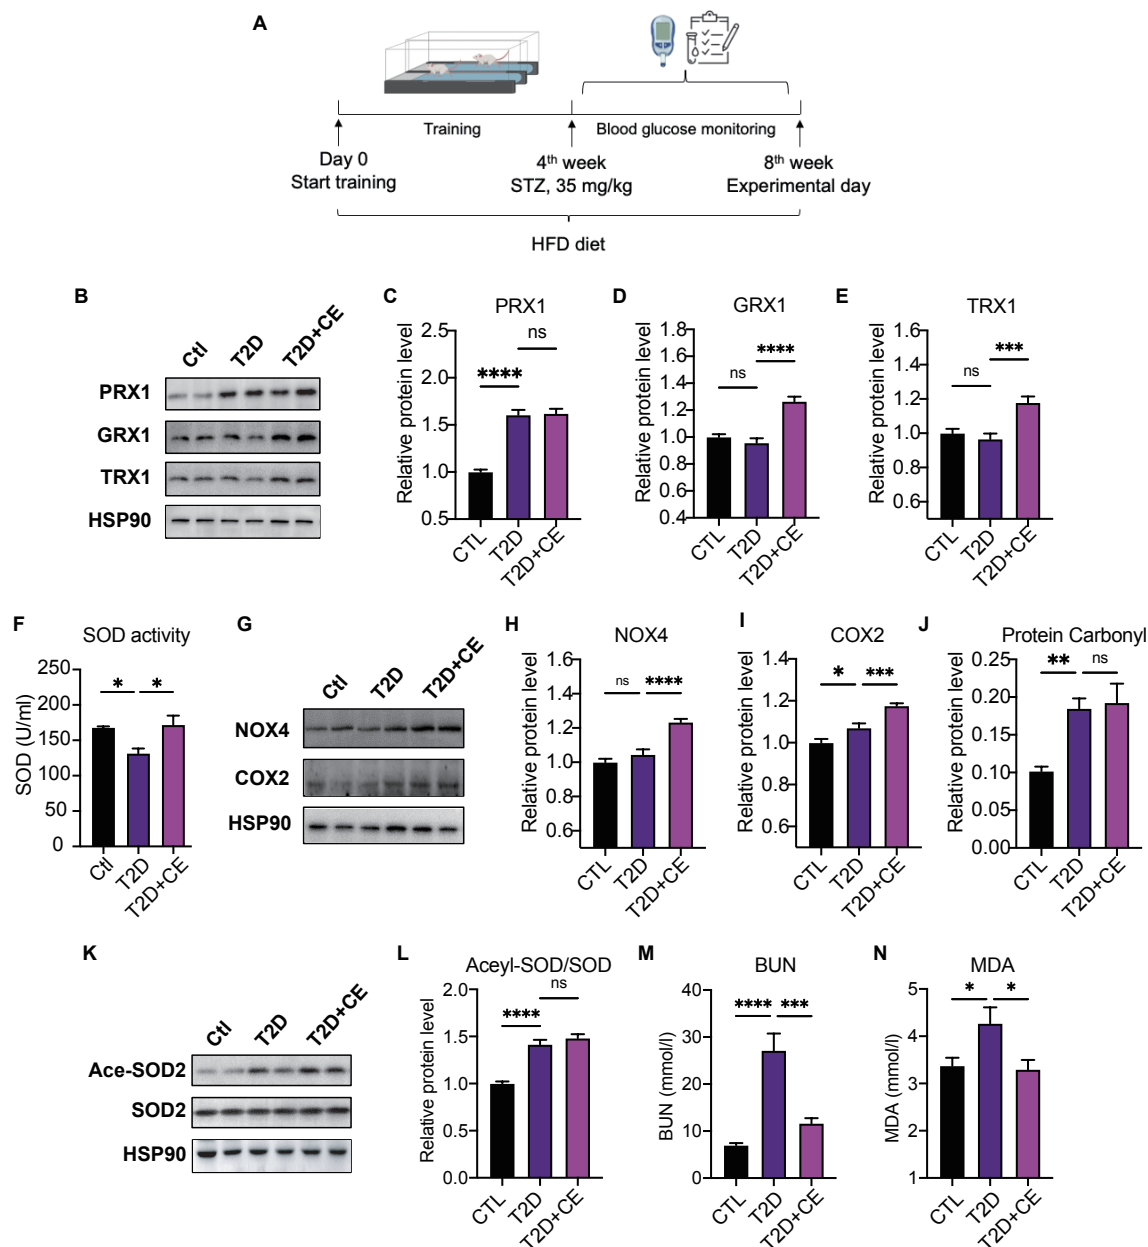

653

654

**Fig. 1 Exercise induced ROS production in exercise group and increased the antioxidant status.**

655

656 **A.** Experimental design. T2DM rats model was fed by high-fat diet plus a low dose of STZ injection

657 (35 mg/kg). The high-fat diet (HFD, 60% calories from fat) was started from the 1<sup>st</sup> week to the 8<sup>th</sup>

658 week. The exercise intervention was started from 1<sup>st</sup> week to 4<sup>th</sup> week. **B-E.** Representative protein

659 level and quantitative analysis of PRX1 (27 kDa), Grx1 (17 kDa), Trx1 (12 kDa) and HSP90 (90

660 kDa) in the rats in the Ctl, T2D and T2D + CE groups. The rat livers were homogenized by 1% SDS

661 and analyzed by Western blots with the appropriate antibodies. **F-I.** Representative protein level and

662 quantitative analysis of NOX4 (27 kDa), COX2 (17 kDa) and HSP90 (90 kDa) in the rats in the Ctl,

663 T2D and T2D + CE groups. **J-K.** Representative protein level and quantitative analysis of Ace-SOD2

664 (27 kDa), SOD2 (17 kDa) and HSP90 (90 kDa) in the rat in the Ctl, T2D and T2D + CE groups. **L-**

665 **M.** Liver MDA content (L) and BUN (M) level was detected in the rats of Ctl, T2D and T2D + CE

666 groups. (ns: not significant; \*P < 0.05, \*\*P < 0.01, \*\*\*P < 0.001, \*\*\*\*P < 0.0001 compared with all

667 groups by one-way ANOVA and Tukey's post hoc test; data are expressed as the mean ± SEM; n =

668 4-8 per group).

668

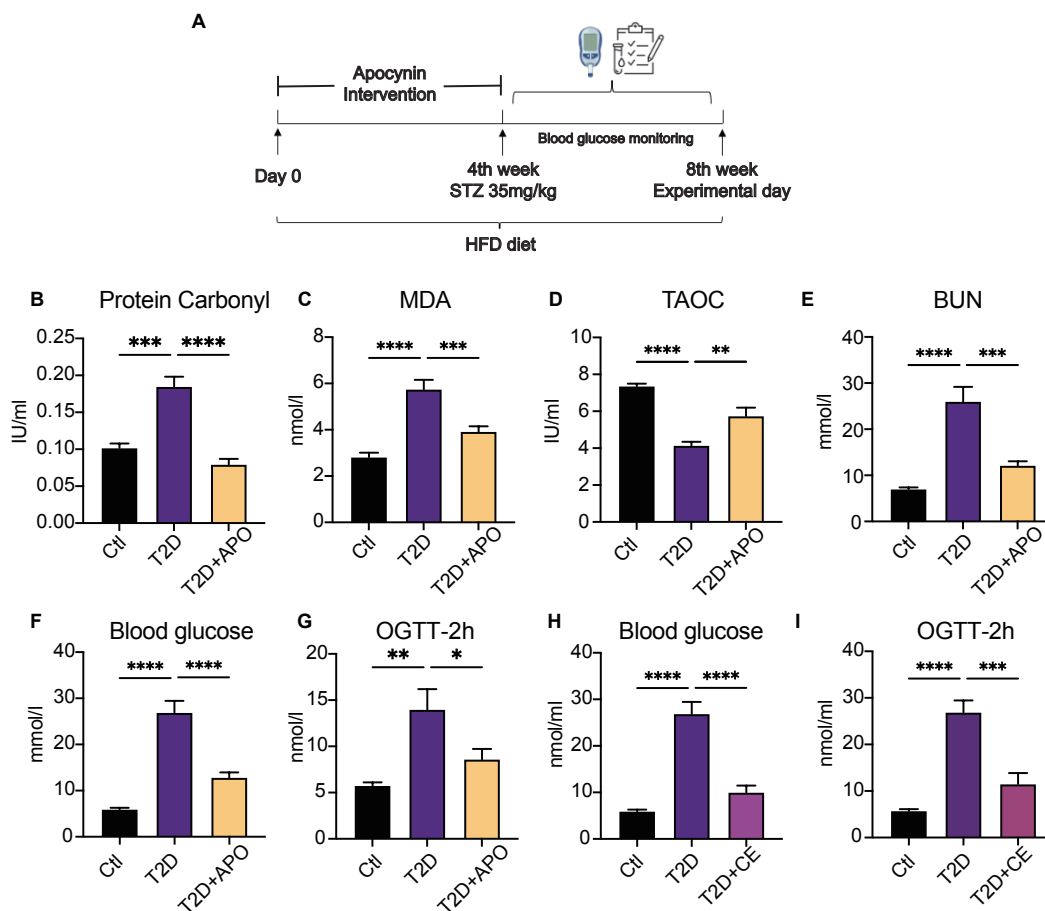

669

670 **Fig.2 Antioxidant intervention alleviates blood glucose through promoting the upregulation of**  
 671 **reducing levels**

672 **A.** Experimental design. T2DM rats model was fed by high-fat diet plus a low dose of STZ injection  
 673 (35 mg/kg). The apocynin intervention was started from 1<sup>st</sup> week to 4<sup>th</sup> week. **B.** Liver protein  
 674 carbonylation was detected in the rats of Ctl, T2D and T2D + Apocynin (APO) groups. **C-E.** Liver  
 675 MDA content (**C**), TAOC (**D**) and BUN (**E**) level was detected in the rats of Ctl, T2D and T2D +  
 676 APO groups. **F.** Postprandial blood glucose levels of Ctl, T2D and T2D + APO groups at the end of  
 677 8<sup>th</sup> week. **G.** Blood glucose level after oral glucose administration in Ctl, T2D and T2D + APO groups  
 678 at the end of 8<sup>th</sup> week. **H.** Postprandial blood glucose levels of Ctl, T2D and T2D + CE groups at the  
 679 end of 8<sup>th</sup> week. **I.** Blood glucose level after oral glucose administration in Ctl, T2D and T2D + CE  
 680 groups at the end of 8<sup>th</sup> week (\*P < 0.05, \*\*P < 0.01, \*\*\*P < 0.001, \*\*\*\*P < 0.0001 compared with  
 681 all groups by one-way ANOVA and Tukey's post hoc test; data are expressed as the mean ± SEM; n  
 682 = 4-8 per group).  
 683

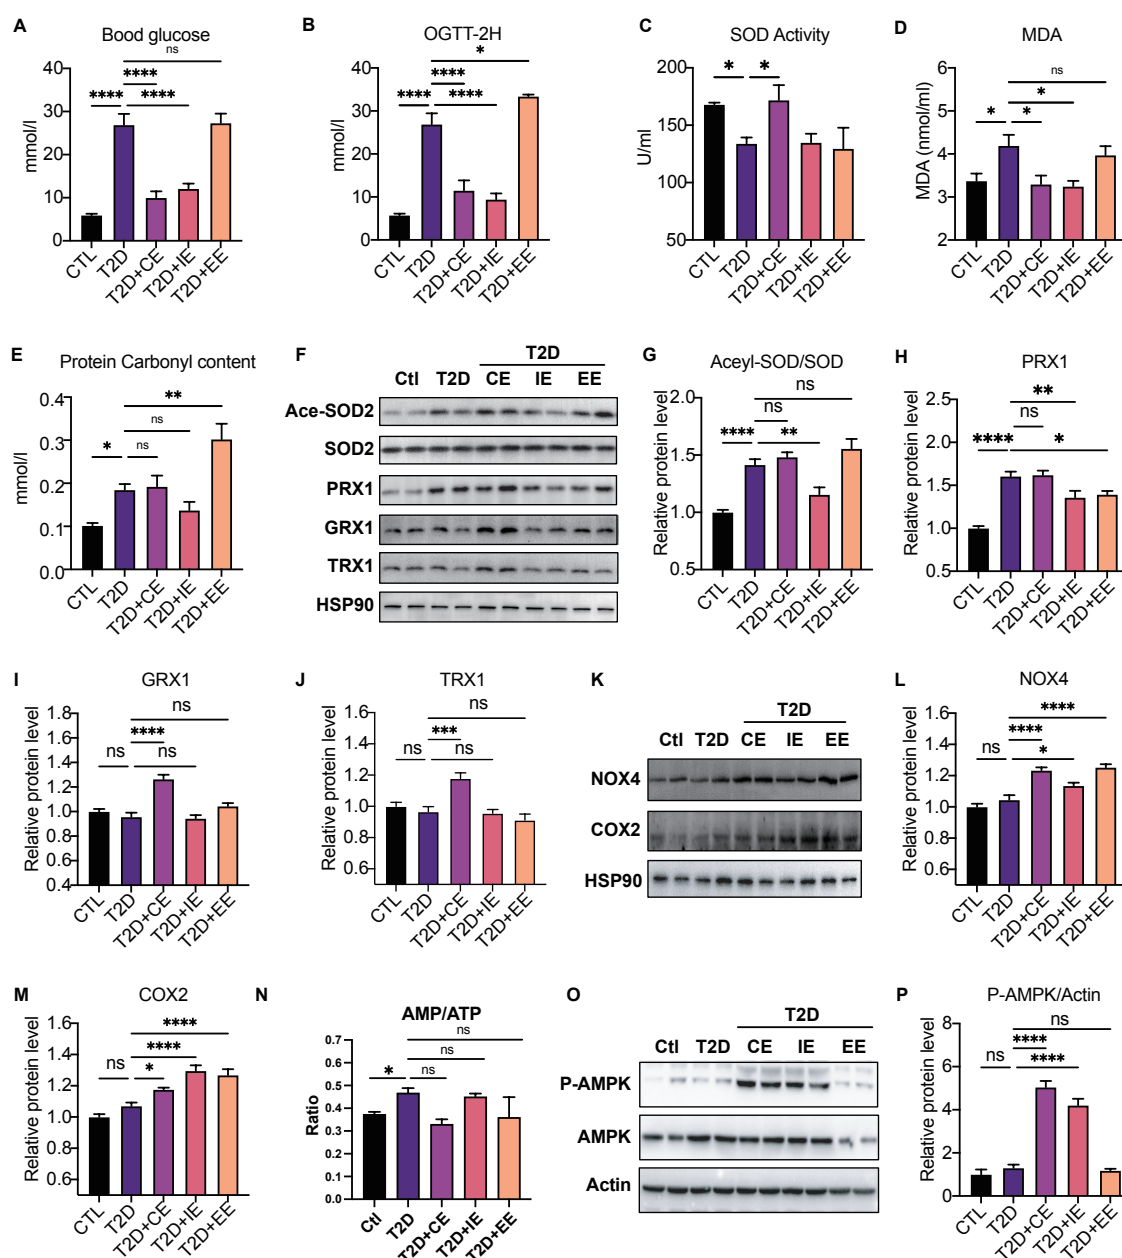

684

685 **Fig.3 Moderate exercise-generated ROS production promotes phosphorylated activation of**  
 686 **AMPK and reduces blood glucose level, while excessive exercise-generated oxidative stress**  
 687 **reduces AMPK expression and exacerbates diabetes.**

688 **A.** Postprandial blood glucose levels of Ctl, T2D, T2D + CE, T2D + IE and T2D + EE groups at the  
 689 end of 8<sup>th</sup> week. **B.** Blood glucose level after oral glucose administration in Ctl, T2D, T2D + CE,  
 690 T2D + IE and T2D + EE groups at the end of 8<sup>th</sup> week. **C-E.** SOD activity (C), liver MDA content  
 691 (D) and liver protein carbonylation content (E) level was detected in the rats of Ctl, T2D, T2D + CE,  
 692 T2D + IE and T2D + EE groups. **F-J.** Representative protein level and quantitative analysis of Ace-  
 693 SOD2 (27 kDa), SOD2 (17 kDa), PRX1 (27 kDa), Grx1 (17 kDa), Trx1 (12 kDa) and HSP90 (90  
 694 kDa) in the rats in the Ctl, T2D, T2D + CE, T2D + IE and T2D + EE groups. **K-N.** Representative  
 695 protein level and quantitative analysis of NOX4 (27 kDa), COX2 (17 kDa) and HSP90 (90 kDa) in  
 696 the rats in the Ctl, T2D, T2D + CE, T2D + IE and T2D + EE groups. **O-P.** Representative protein  
 697 level and quantitative analysis of P-AMPK (67 kDa), AMPK (67 kDa) and Actin (45 kDa) in the rats  
 698 in the Ctl, T2D, T2D + CE, T2D + IE and T2D + EE groups. (ns: not significant; \*P < 0.05, \*\*P <  
 699 0.01, \*\*\*P < 0.001, \*\*\*\*P < 0.0001 compared with all groups by one-way ANOVA and Tukey's  
 700 post hoc test; data are expressed as the mean ± SEM; n = 4-8 per group).

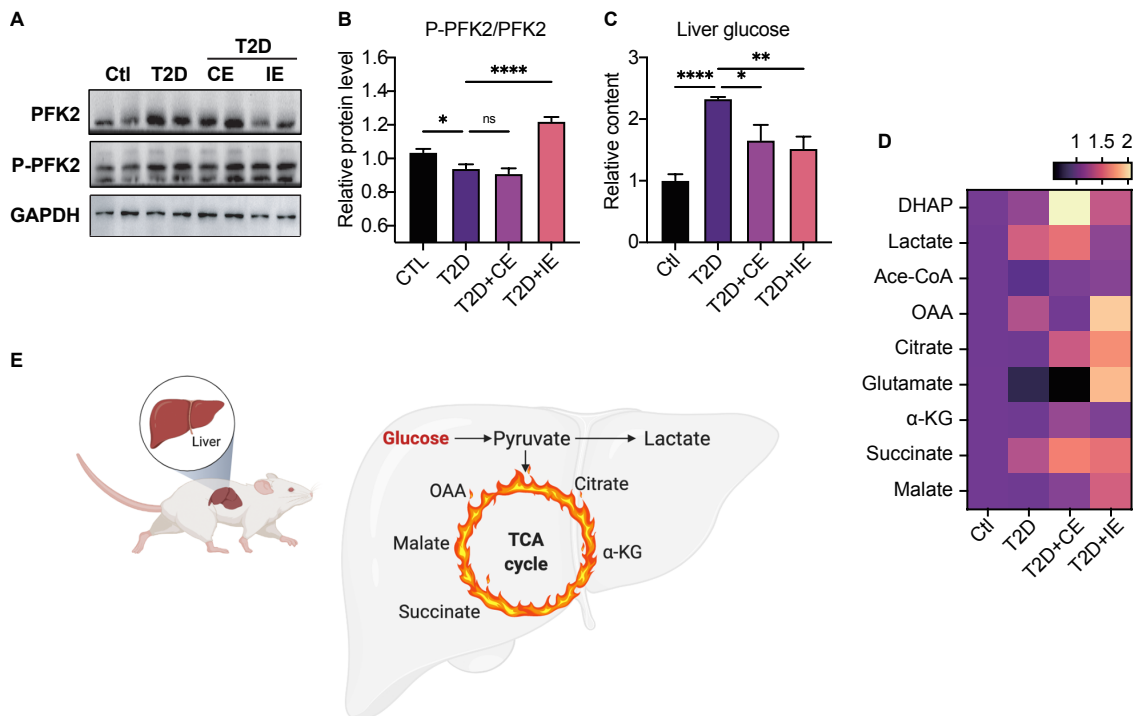

701

702 **Fig.4 Moderate exercise promoted glycolysis and mitochondrial tricarboxylic acid cycle in the**  
 703 **liver of diabetic rats.**

704 **A-B.** Representative protein level and quantitative analysis of P-PFK2 (64 kDa), PFK2 (64 kDa) and  
 705 GAPDH (37 kDa) in the rats in the Ctl, T2D, T2D + CE and T2D + IE groups. **C.** Liver glucose level  
 706 after oral glucose administration in Ctl, T2D, T2D + CE and T2D + IE groups at the end of 8<sup>th</sup> week.  
 707 **D.** Relative concentrations of substrates for glycolysis (DHAP and Lactate) and the tricarboxylic acid  
 708 cycle (citrate, succinate and malate) in the rat of Ctl, T2D, T2D + CE and T2D + IE groups. The  
 709 concentration of substrates was analyzed by LC-MS/MS. **E.** Schematic diagram illustrating the effect  
 710 of CE and IE on glycolysis and mitochondrial tricarboxylic acid cycle (ns: not significant; \*P < 0.05,  
 711 \*\*P < 0.01, \*\*\*\*P < 0.0001 compared with all groups by one-way ANOVA and Tukey's post hoc  
 712 test; data are expressed as the mean ± SEM; n = 6-8 per group).

713



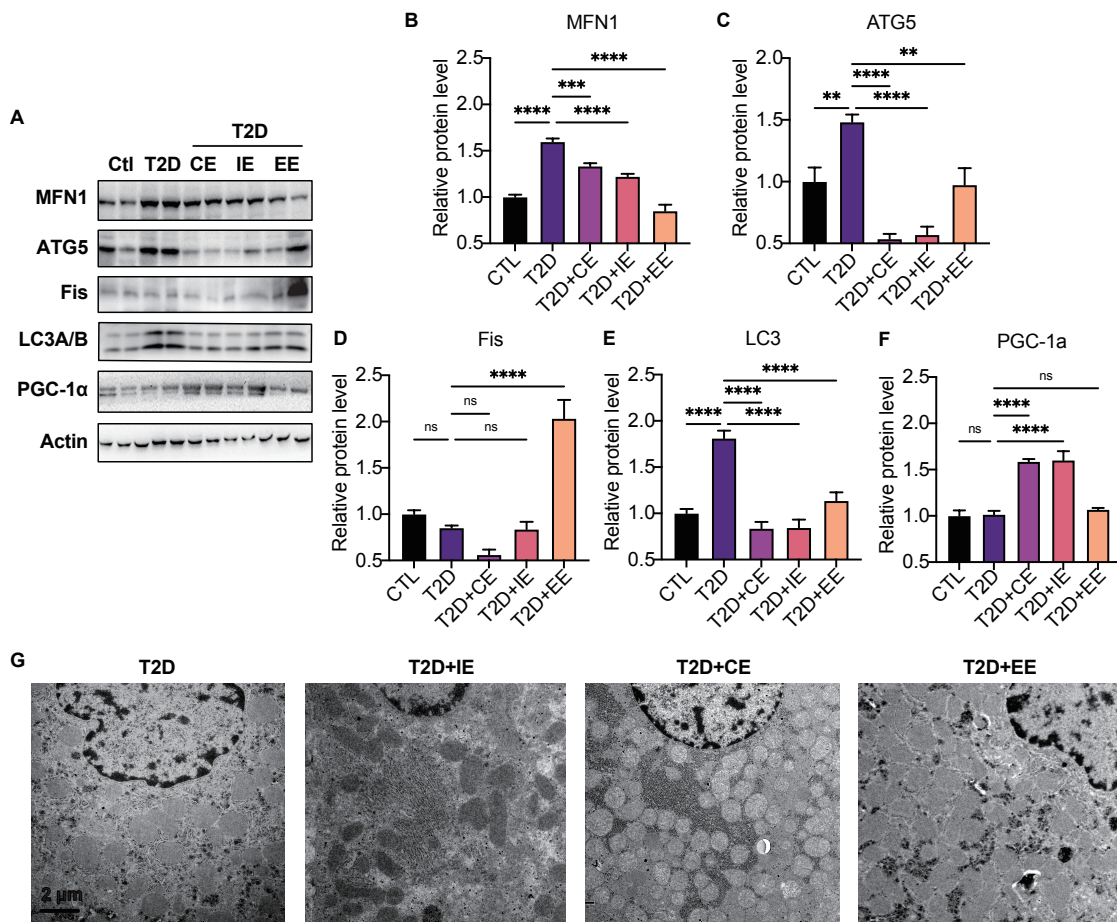

714

715 **Fig.5 Excessive exercise promoted hepatic mitophagy, inhibited the mitochondrial biogenesis**  
 716 **and destroyed the mitochondrial structure.**

717 **A-F.** Representative protein level and quantitative analysis of MFN1 (82 kDa), ATG5 (55 kDa), FIS  
 718 (25 kDa), LC3A/B (14,16 kDa), PGC-1 $\alpha$  (130 kDa) and Actin (45 kDa) in the rats in the Ctl, T2D,  
 719 T2D + CE, T2D + IE and T2D + EE groups. **G.** TEM analysis of the ultrastructure of hepatocytes in  
 720 the rats in the T2D, T2D + CE, T2D + IE and T2D + EE groups. (Scale bar = 2  $\mu$ m; ns: not significant;  
 721 \* $P < 0.05$ , \*\* $P < 0.01$ , \*\*\* $P < 0.001$ , \*\*\*\* $P < 0.0001$  compared with all groups by one-way ANOVA  
 722 and Tukey's post hoc test; data are expressed as the mean  $\pm$  SEM; n = 8 per group).

723

724



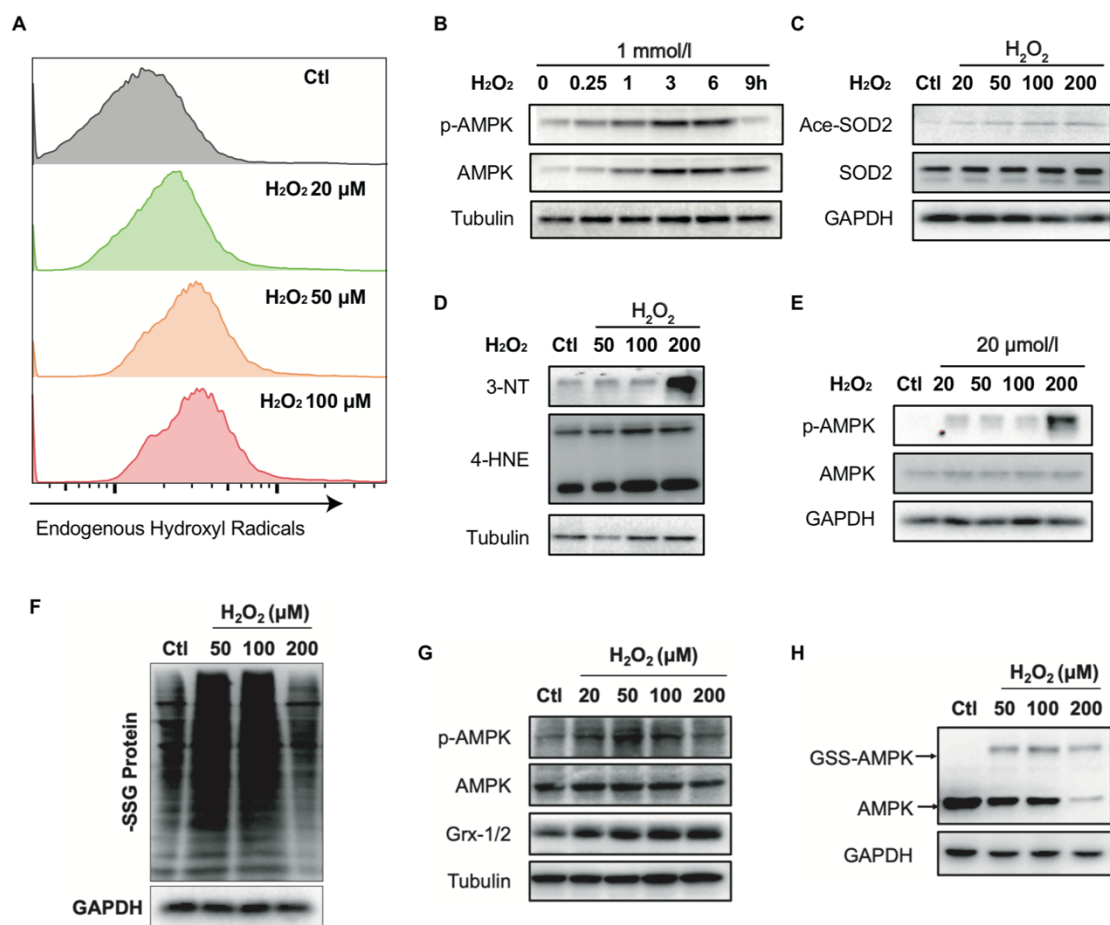

725

726 **Fig. 6 ROS differentially regulated AMPK activation through Grx-mediated glutathionylation**  
727 **within redox balance threshold.**

728 **A.** Analysis of superoxide generation using flow cytometry and a hydroethidine probe in L02 cells  
729 under H<sub>2</sub>O<sub>2</sub> stress (50–200 μmol/l, 30 min). **B.** Representative protein level of 4-HNE, 3-NT and  
730 GAPDH (37 kDa) in L02 cells under H<sub>2</sub>O<sub>2</sub> stress (50–200 μmol/l, 30 min). **C.** Representative protein  
731 level of Aceyl-SOD2, SOD2 and GAPDH (37 kDa) in L02 cells under H<sub>2</sub>O<sub>2</sub> stress (50–200 μmol/l,  
732 30 min). **D.** GSS-adduct protein level in L02 cells under H<sub>2</sub>O<sub>2</sub> stress (50–200 μmol/l). L02 cells  
733 loaded with EE-GSH-biotin were incubated with/without H<sub>2</sub>O<sub>2</sub> for 30 min, and the amounts of GSS-  
734 protein adduct formation were determined using non-reducing SDS-PAGE and Western blot analysis  
735 with streptavidin-HRP. **E.** Representative protein level of P-AMPK (67 kDa), AMPK (67 kDa), Grx-  
736 1/2 (12 kDa) and Tubulin (55 kDa) in L02 cells under H<sub>2</sub>O<sub>2</sub> stress (50–200 μmol/l, 30 min). **F.** AMPK  
737 cysteine gel shift immunoblot. Cysteine dependent shifts by incubation of AMPK protein with  
738 glutathione reductase and PEG-Mal. PEG2-mal labelled glutathionylation modification shifts AMPK  
739 by ~10 kDa above the native molecular weight.

740

741

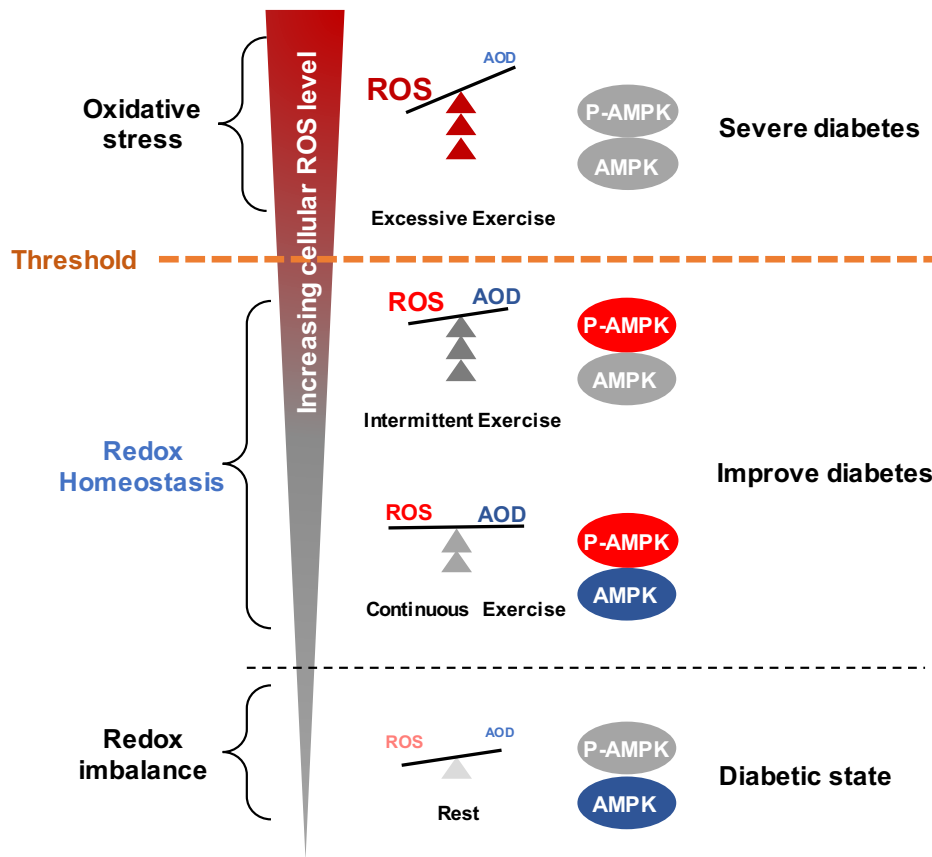

742

743

**Fig.7 Schematic diagram of redox balance threshold.**

744

Moderate exercise promotes the activity of antioxidant enzymes by generating benign ROS, directly promotes AMPK-mediated glycolysis and aerobic oxidation, thus reduces glucose levels in blood and liver. Excessive exercise causes excess ROS and exceed the redox balance threshold, inhibiting AMPK activity and expression, thus leading to exacerbation of diabetes. (AMPK and P-AMPK in grey circles indicate decrease, red circles indicate increase, blue circles indicate no significant changes).

745

746

747

748

749
